# Supplementary material for: Association between sleep duration and mortality risk among adults with type 2 diabetes: a prospective cohort study
Source: Springer Nature journal article supplement (doi:10.1007/s00125-020-05214-4), 2020-07-15
Supplement: MOESM1 [file 18185686]

## Electronic supplementary material

ESM Table 1. ICD codes for specific causes of death

|                                             | ICD10                               |
|---------------------------------------------|-------------------------------------|
| All - CVD                                   | I00-I09, I11, I13, I20-I51, I60-I69 |
| Heart disease                               | I00-I09, I11, I13, I20-I51          |
| Stroke                                      | I60-I69                             |
| All cancer                                  | C00-C97                             |
| Chronic lower respiratory diseases          | J40-J47                             |
| Alzheimer's disease                         | G30                                 |
| Diabetes mellitus                           | E10-E14                             |
| Influenza and pneumonia                     | J09-J18                             |
| Nephritis, nephrotic syndrome and nephrosis | N00-N07, N17-N19, N25-N27           |

Reference. The 113 underlying cause of death recode were used to regroup the specific mortality according to the NCHS.

ESM Table 2. Baseline characteristics among non-diabetes population according to sleep duration.

| Baseline Characteristics                         | Sleep duration (h/d) |               |               |               |              |              |
|--------------------------------------------------|----------------------|---------------|---------------|---------------|--------------|--------------|
|                                                  | ≤ 5                  | 6             | 7             | 8             | 9            | ≥10          |
| Sample size                                      | 20,676 (7.8)         | 52,316 (20.8) | 75,182 (31.0) | 79,669 (32.2) | 11,313 (4.6) | 9,661 (3.8)  |
| Mean age, (years)                                | 46.49                | 45.63         | 45.47         | 46.68         | 48.86        | 52.14        |
| Sex (%)                                          |                      |               |               |               |              |              |
| Male                                             | 8,760 (46.9)         | 23,563 (49.3) | 34,671 (49.9) | 34,595 (47.0) | 4,505 (43.3) | 4,010 (45.5) |
| Female                                           | 11,916 (53.1)        | 28,753 (50.7) | 40,511 (50.2) | 45,074 (53.0) | 6,808 (56.7) | 5,651 (54.5) |
| Race (%)                                         |                      |               |               |               |              |              |
| Hispanic                                         | 3,278 (12.2)         | 8,381 (12.5)  | 12,526 (12.8) | 15,956 (15.7) | 2,052 (14.3) | 1,668 (13.9) |
| Non-Hispanic White                               | 11,887 (66.0)        | 31,418 (68.1) | 48,787 (72.6) | 48,295 (68.6) | 7,238 (71.4) | 5,585 (65.8) |
| Non-Hispanic Black                               | 4,342 (16.8)         | 8,989 (13.4)  | 8,781 (8.9)   | 10,808 (10.5) | 1,497 (10.0) | 1,996 (16.5) |
| Non-Hispanic Other                               | 1,169 (5.0)          | 3,528 (6.0)   | 5,088 (5.7)   | 4,610 (5.2)   | 562 (4.4)    | 412 (3.8)    |
| Education level (%)                              |                      |               |               |               |              |              |
| Less than high school degree                     | 4,059 (17.6)         | 7,524 (12.7)  | 9,409 (10.9)  | 14,437 (15.8) | 2,363 (18.2) | 2,854 (27.9) |
| High school degree                               | 6,014 (30.4)         | 13,878 (27.1) | 17,926 (24.1) | 21,876 (28.1) | 3,362 (31.4) | 3,187 (34.3) |
| More than high school degree                     | 10,510 (51.5)        | 30,727 (59.8) | 47,504 (64.4) | 42,878 (55.4) | 5,540 (50.0) | 3,529 (36.8) |
| Income (%)                                       |                      |               |               |               |              |              |
| Low                                              | 4,780 (18.1)         | 8,327 (12.0)  | 9,647 (9.5)   | 13,504 (12.9) | 2,236 (15.4) | 2,589 (21.7) |
| Middle                                           | 10,805 (52.6)        | 26,392 (49.2) | 35,816 (45.6) | 40,262 (49.0) | 6,072 (52.4) | 5,374 (56.7) |
| High                                             | 5,091 (29.4)         | 17,597 (38.8) | 29,719 (44.9) | 1,763 (38.1)  | 3,005 (32.1) | 1,698 (21.6) |
| BMI (kg/m <sup>2</sup> ) (%)                     |                      |               |               |               |              |              |
| Normal weight/Underweight, <25 kg/m <sup>2</sup> | 6,773 (32.3)         | 18,612 (35.4) | 29,923 (39.5) | 32,057 (40.9) | 4,722 (43.0) | 3,917 (42.1) |
| Pre-obesity, 25-30 kg/m <sup>2</sup>             | 6,768 (33.0)         | 17,959 (34.6) | 26,589 (35.5) | 27,361 (34.3) | 3,712 (32.1) | 2,885 (29.6) |
| Obesity, >30 kg/m <sup>2</sup>                   | 6,577 (32.0)         | 14,358 (27.5) | 16,658 (22.3) | 17,918 (21.9) | 2,600 (22.5) | 2,586 (25.9) |
| Physical activity (meeting,%)                    | 7,870 (39.9)         | 23,200 (45.6) | 36,057 (49.3) | 24,296 (44.9) | 4,530 (41.9) | 2,605 (28.7) |
| Smoking status (%)                               |                      |               |               |               |              |              |
| Never                                            | 10,284 (49.0)        | 29,730 (56.1) | 46,796 (62.0) | 48,893 (61.4) | 6,467 (57.6) | 4,846 (50.0) |
| Former smoker                                    | 4,001 (19.5)         | 10,635 (20.6) | 15,425 (20.7) | 16,242 (20.4) | 2,590 (22.2) | 2,386 (23.7) |
| Current smoker                                   | 6,365 (31.4)         | 11,871 (23.2) | 12,827 (17.1) | 14,334 (17.9) | 2,245 (20.2) | 2,407 (26.1) |
| Hypertension (%)                                 | 7,003 (31.5)         | 14,443 (25.7) | 17,598 (22.1) | 20,343 (23.3) | 3,482 (27.6) | 3,604 (33.4) |
| CHD (%)                                          | 1,086 (4.7)          | 1,808 (3.1)   | 2,170 (2.7)   | 2,858 (3.3)   | 567 (4.6)    | 786 (7.6)    |
| Stroke (%)                                       | 737 (3.2)            | 1,109 (1.8)   | 1,089 (1.2)   | 1,718 (1.8)   | 423 (3.4)    | 779 (7.5)    |
| Cancer (%)                                       | 1,818 (8.4)          | 3,682 (6.7)   | 4,993 (6.4)   | 6,066 (7.2)   | 1,152 (9.6)  | 1,231 (12.1) |

Values are n (percentage).

Abbreviation: BMI, body mass index, CHD, coronary heart disease

**ESM Table 3. Sensitivity analysis excluding individuals with CHD, stroke and cancer for the association of sleep duration with all-cause and cause-specific mortality.**

| Outcomes                          | N. of participants | N. of Deaths | Sleep duration (h/d) |                  |         |                  |                   |                   |
|-----------------------------------|--------------------|--------------|----------------------|------------------|---------|------------------|-------------------|-------------------|
|                                   |                    |              | ≤ 5                  | 6                | 7       | 8                | 9                 | ≥10               |
| All-cause mortality               | 16,014             | 2,153        | 1.28 (1.06,1.55)     | 1.22 (1.03,1.45) | 1(ref.) | 1.04 (0.89,1.21) | 1.38 (1.11,1.70)  | 1.73 (1.41,2.13)  |
| Cancer mortality                  | 16,014             | 456          | 1.40 (0.92,2.12)     | 1.11 (0.76,1.60) | 1(ref.) | 1.12 (0.82,1.53) | 1.26 (0.80,1.99)  | 1.23 (0.77,1.97)  |
| CVD mortality                     | 16,014             | 387          | 1.25 (0.77,2.02)     | 1.45 (0.99,2.13) | 1(ref.) | 1.04 (0.70,1.54) | 1.54 (0.90,2.64)  | 1.87 (1.20,2.92)  |
| Heart disease mortality           | 16,014             | 299          | 0.91 (0.51,1.63)     | 1.30 (0.82,2.07) | 1(ref.) | 0.94 (0.60,1.47) | 1.58 (0.87,2.89)  | 1.69 (1.01,2.82)  |
| Stroke mortality                  | 16,014             | 88           | 2.95 (1.15,7.61)     | 2.21 (0.95,5.14) | 1(ref.) | 1.51 (0.66,3.35) | 1.42 (0.41,4.96)  | 2.70 (1.12,6.49)  |
| Influenza and Pneumonia mortality | 16,014             | 44           | 1.54 (0.46,5.12)     | 0.16 (0.02,1.30) | 1(ref.) | 1.24 (0.44,3.50) | 0.82 (0.22,3.12)  | 0.92 (0.26,3.34)  |
| Kidney disease mortality          | 16,014             | 68           | 1.94 (0.78,4.80)     | 2.07 (0.81,5.26) | 1(ref.) | 0.67 (0.27,1.64) | 1.94 (0.55,6.85)  | 4.70 (0.95,23.22) |
| Alzheimer's disease mortality     | 16,014             | 35           | 2.58 (0.57,11.65)    | 1.11 (0.21,5.89) | 1(ref.) | 1.11 (0.23,5.45) | 1.94 (0.36,10.61) | 4.70 (0.95,23.22) |
| CLRD mortality                    | 16,014             | 94           | 1.05 (0.35,3.13)     | 1.69 (0.73,3.95) | 1(ref.) | 2.23 (1.03,4.28) | 1.90 (0.66,5.47)  | 3.26 (1.39,7.64)  |

Values are HR (95% CI);

Abbreviation: CHD, coronary heart disease; CI, confidence interval; CLRD, chronic lower respiratory diseases; CVD, cardiovascular disease; HR, hazard ratio, N., number.
